# Supplementary material for: Microarray-Based Approach Identifies Differentially Expressed MicroRNAs in Porcine Sexually Immature and Mature Testes
Source: PLoS One. 2010 Aug 18;5(8):e11744. doi: 10.1371/journal.pone.0011744 (PMC2923610; doi:10.1371/journal.pone.0011744)
Supplement: Table S4 — Primer pairs used to confirm the differentially expressed miRNAs and target genes. (0.02 MB XLS) [file pone.0011744.s004.xls]

## Sheet: Table S8
Table S4: Primer pairs used to confirm the differentially expressed miRNAs and target genes
by quantitative RT-PCR.
miRNA or gene Name	Sequence (5'-3')	Product Length(bp)	Tm (℃)
RTmiR143	GGTGGTGAGATGAAGCACTGTA	68	58
RTmiR145	AGTCCAGTTTTCCCAGGAATC	70	58
RTmiR155	TTTAATGCTAATTGTGATAGGG	70	58
RTmiR638	AATTTAATTTAGGATCGCGGG	71	58
RTmiR542-3P	GGGGTGTGACAGATTGATAACT	69	58
RTmiR1	GGGTGGAATGTAAAGAAGTATG	68	58
RTmiR762	AAAATAGGGGGCTGGGG	68	60
RTmiR705	AATAAATGGTGGGAGGTGGG	67	58
RTmiR663	AATCATTTGTAGGCGGGGC	68	58
Poly(T) adapter	GCGAGCACAGAATTAATACGACTCACTATA GG(T)12VN*(*V = A, G, C ;N = A, T, G, C.)
Reverse primer	GCGAGCACAGAATTAATACGAC
18SFbc	TTTCGCTCTGGTCCGTCTTG	101	56-64
18SRbc	TTCGGAACTGAGGCCATGAT
AQN-F	CAGCAGAGTTTTTGTGGCA	157	56
AQN-R	GCTCAAGGCATTGGAAGA
DAZL-F	TGGGCTCCTTGTTAGATGTCG	115	58
DAZL-R	GGAAACCTCCTGGAAGAATGG
HAS3-F	TGACTCCGTGGACTACATT	114	58
HAS3-R	CCCCCAACTCCCCCTACT
RNF4-F	AGACAAGCCCAGAAGCGAACT	185	58
RNF4-R	CGCCTCCTTTCTTCAACAATCA
SMCP-F	GCACCTGCCTGAATAAGGAGAC	103	60
SMCP-R	GGTTTGGACCCCTGTCTTGG
SPAG-F	TCCCTCTTTGGTGTATCA	138	58
SPAG-R	TGTTTGCTTGGGGTGTCT
SPAM-F	GCTTGACTGGTTGTGGAA	144	58
SPAM-R	CTTTGAGCATTGGCTACTTT
actin158F	CCAGGTCATCACCATCGG	158	56-63
actin158R	CCGTGTTGGCGTAGAGGT
