# Supplementary material for: Microarray-Based Approach Identifies Differentially Expressed MicroRNAs in Porcine Sexually Immature and Mature Testes
Source: PLoS One. 2010 Aug 18;5(8):e11744. doi: 10.1371/journal.pone.0011744 (PMC2923610; doi:10.1371/journal.pone.0011744)
Supplement: Table S5 — Characteristics analysis of differentially expressed miRNAs. (0.12 MB XLS) [file pone.0011744.s005.xls]

## Sheet: Sheet1
Table S5: Characteristics analysis of differentially expressed miRNAs
Index	Porcine miRNA	Chromosome Coordinates	Reporter Name and sequence		Sus Sucrofa Chromosome
1.	let-7e	emb|CU019573.2|	>hsa-let-7e		6
		SSC6 clone CH242-21M5	UGAGGUAGGAGGUUGUAUAGUU
2.	miR-1		>ppa-miR-1
			UGGAAUGUAAAGAAGUAUGUA
3	miR-1	ssc-miR-1	>hsa-miR-1
		emb|CU607084.2|	UGGAAUGUAAAGAAGUAUGUAU		17
		ssc17 clone CH242-119P9
4	miR-101		>ggo-miR-101
			UACAGUACUGUGAUAACUGAAG
5.	miR-101	>ssc-mir-101a-2	>hsa-miR-101		6 or 1
		emb|CU457759.2|	UACAGUACUGUGAUAACUGAA
		SSC6 clone CH242-261B4
		>ssc-mir-101a-1
		emb|CU467061.2|
		SSC1 clone CH242-40P15 MI0010678
6.	miR-106a	emb|FP015951.2|	>mmu-miR-106a		X
		SSCX CH242-54G11	CAAAGUGCUAACAGUGCAGGUAG
7.	miR-106b*		>hsa-miR-106b*
			UAAAGUGCUGACAGUGCAGAU
8.	miR-10b	emb|CU570829.2| SSC15 clone CH242-243K13	>hsa-miR-10b		15
		gb|AC129968.3| gb|AC129967.3| RP44-167C22,	UACCCUGUAGAACCGAAUUUGUG
		RP44-276C1
9.	miR-122	emb|CU062642.3|	>ssc-miR-122		1
		SSC1 clone CH242-134P7	UGGAGUGUGACAAUGGUGUUUGU
10.	miR-122		>hsa-miR-122
			UGGAGUGUGACAAUGGUGUUUG
11.	miR-122		>mdo-miR-122
			UGGAGUGUGACAAUGGUGUUUGUGU
12.	miR-125b-2*		>hsa-miR-125b-2*
			UCACAAGUCAGGCUCUUGGGAC
13.	miR-130a		>mdo-miR-130a
			CAGUGCAAUGUAAAAAGGGCAU
14.	miR-130a		>ggo-miR-130a
			CAGUGCAAUGUUAAAAGGGC
15.	miR-130a	SSC2 clone CH242-140O21	>hsa-miR-130a		2
			CAGUGCAAUGUUAAAAGGGCAU
16.	miR-132	SSC12 clone CH242-53A19	>hsa-miR-132		12
			UAACAGUCUACAGCCAUGGUCG
17.	miR-133a		>ppy-miR-133a
			UUGUCCCCUUCAACCAGCUGU
18.	miR-133a		>ggo-miR-133a
			UUGGUCCCCUUCAACCAGCUGU
19.	miR-133a	SSC17 clone CH242-119P9	>hsa-miR-133a		17
			UUUGGUCCCCUUCAACCAGCUG
20.	miR-133a		>ptr-miR-133a
			UUGGUCCCCUUCAACCAGCUG
21.	miR-133b	SSC7 clone CH242-280I14	>hsa-miR-133b		7
			UUUGGUCCCCUUCAACCAGCUA
22.	miR-134		>hsa-miR-134
			UGUGACUGGUUGACCAGAGGGG
23.	miR-137	SSC4 clone CH242-94N4	>hsa-miR-137		4
			UUAUUGCUUAAGAAUACGCGUAG
24.	miR-143	SSC2 clone CH242-216N6	>hsa-miR-143		2
		SSC2 clone CH242-55J13	UGAGAUGAAGCACUGUAGCUC
25.	miR-143		>mdo-miR-143
			UGAGAUGAAGCACUGUAGCUCG
26.	miR-143		>rno-miR-143
			UGAGAUGAAGCACUGUAGCUCA
27.	miR-145	ssc-mir-145	>hsa-miR-145		2
		SSC2 clone CH242-216N6,SSC2 clone CH242-55J13	GUCCAGUUUUCCCAGGAAUCCCU
28.	miR-145		>ggo-miR-145
			GUCCAGUUUUCCCAGGAAUCCCUU
29.	miR-148a	ssc-mir-148a	>hsa-miR-148a		18
		SSC18 clone CH242-341P10	UCAGUGCACUACAGAACUUUGU
30.	miR-149*	SSC15 clone CH242-111J1	>hsa-miR-149*		15
			AGGGAGGGACGGGGGCUGUGC
31.	miR-155		>hsa-miR-155
			UUAAUGCUAAUCGUGAUAGGGGU
32.	miR-155		>mmu-miR-155UUAAUGCUAAUUGUGAUAGGGGU
33.	miR-16		>bta-miR-16UAGCAGCACGUAAAUAUUGGC
34.	miR-16	ssc-mir-16-1	>hsa-miR-16		11
		emb|CU062573.2|	UAGCAGCACGUAAAUAUUGGCG
		SSC11 clone CH242-415L14
35.	miR-17*	emb|CU019588.1|	>hsa-miR-17*		11
		SSC11 clone CH242-392I14	ACUGCAGUGAAGGCACUUGUAG
36.	miR-181b	SSC1 clone CH242-266J10	>hsa-miR-181b		1
		SSC1 clone CH242-524N14	AACAUUCAUUGCUGUCGGUGGGU
37.	miR-181b		>mdo-miR-181bAACAUUCAUUGCUGUCGGUGGG
38.	miR-181b		>bta-miR-181bAACAUUCAUUGCUGUCGGUGGGUUU
39.	miR-181b		>ggo-miR-181bAACAUUCAUUGCUGUCGGUGGGUU
40.	miR-181c	emb|FP016000.3| SSC2 clone CH242-10C10	>bta-miR-181c		2
			AGCUACAUUGUCUGCUGGGUUU
41.	miR-181d		>hsa-miR-181d
			AACAUUCAUUGUUGUCGGUGGGU
42.	miR-182	emb|CU695052.2| SSC18 clone CH242-289O4	>hsa-miR-182		18
			UUUGGCAAUGGUAGAACUCACACU
43.	miR-182		>ppy-miR-182
			UUUGGCAAUGGUAGAACUCACA
44.	miR-186	SSC-miR-186	>hsa-miR-186
		emb|CU928877.2| SSC6 clone CH242-191N20	CAAAGAAUUCUCCUUUUGGGCU		6
45.	miR-186		>ggo-miR-186
			CAAAGAAUUCUCCUUUUGGGCUU
46.	miR-187	emb|CU694241.2| SSC6 clone CH242-236B22	>hsa-miR-187		6
			UCGUGUCUUGUGUUGCAGCCGG
47.	miR-18b	emb|FP015951.2|	>hsa-miR-18b		X
		SSCX clone CH242-54G11	UAAGGUGCAUCUAGUGCAGUUAG
48.	miR-192	emb|CU606982.2| SSC2 clone CH242-431G15	>hsa-miR-192		2
			CUGACCUAUGAAUUGACAGCC
49.	miR-198		>hsa-miR-198
			GGUCCAGAGGGGAGAUAGGUUC
50.	miR-198		>sla-miR-198
			GGUCCAGAGGGGAGCUCGA
51.	miR-198		>mml-miR-198
			GGUCCAGAGGGGAAAUAGG
52.	miR-198		>ggo-miR-198
			GGUCCAGAGGGGAGAUAGG
53.	miR-198		>age-miR-198
			GGUCCAGAGGGGAGCUAGG
54.	miR-199a-5p	emb|CU928849.2| SSC2 clone CH242-1G23	>hsa-miR-199a-5p		2 or 1
		emb|CU582767.2| SSC1 clone CH242-108E18	CCCAGUGUUUAGACUAUCUGUUC
		emb|CU234126.2| SSC1 clone CH242-282L14
55.	miR-199b*	emb|CU582767.2| SSC1 clone CH242-108E18	>mmu-miR-199b*		1 or 2
		emb|CU234126.2| SSC1 clone CH242-282L14	CCCAGUGUUUAGACUACCUGUUC
		emb|CU928849.2| SSC2 clone CH242-1G23
56.	miR-19b	emb|CU019588.1| SSC11 clone CH242-392I14	>hsa-miR-19b		11
			UGUGCAAAUCCAUGCAAAACUGA
57.	miR-200b		>bta-miR-200b
			UAAUACUGCCUGGUAAUGAUG
58.	miR-200b		>hsa-miR-200b
			UAAUACUGCCUGGUAAUGAUGA
59.	miR-202*		>hsa-miR-202*
			UUCCUAUGCAUAUACUUCUUUG
60.	miR-202-3p		>mmu-miR-202-3p
			AGAGGUAUAGCGCAUGGGAAGA
61.	miR-202-5p		>mmu-miR-202-5p
			UUCCUAUGCAUAUACUUCUUU
62.	miR-203		>hsa-miR-203
			GUGAAAUGUUUAGGACCACUAG
63.	miR-20b		>bta-miR-20b
			CAAAGUGCUCACAGUGCAGGUA
64.	miR-20b		>hsa-miR-20b
			CAAAGUGCUCAUAGUGCAGGUAG
65.	miR-20b-5p		>rno-miR-20b-5p
			CAAAGUGCUCAUAGUGCAGGU
66.	miR-214	SSC emb|CU928940.3| SSC9 clone CH242-125A3	>hsa-miR-214		9
			ACAGCAGGCACAGACAGGCAGU
67.	miR-214		>rno-miR-214
			ACAGCAGGCACAGACAGGCAG
68		emb|CU929485.1| , SSC8 clone CH242-411L3	>hsa-miR-218		8
	miR-218	emb|CU856070.1|, SSC8 clone CH242-92I12	UUGUGCUUGAUCUAACCAUGU
69	miR-221	emb|CU207321.3| SSCX clone CH242-186C11	>bta-miR-221		X
			AGCUACAUUGUCUGCUGGGUUU
70.	miR-224	emb|FP074856.3| SSCX clone CH242-266P11	>rno-miR-224		X
			CAAGUCACUAGUGGUUCCGUUUA
71.	miR-23b	emb|CU929857.2|	>hsa-miR-23b		10
		SSC10 clone CH242-94A4	AUCACAUUGCCAGGGAUUACC
72.	miR-23b*		>hsa-miR-23b*
			UGGGUUCCUGGCAUGCUGAUUU
73.	miR-24	ssc-mir-24	>mdo-miR-24		2
		emb|FP016000.3| SSC2 clone CH242-10C10	UGGCUCAGUUCAGCAG
74.	miR-24-1*		>rno-miR-24-1*		10
		HSAemb|CU929857.2| SSC10 clone CH242-94A4	GUGCCUACUGAGCUGAUAUCAG
75.	miR-24-2*	emb|FP016000.3| SSC 2 clone CH242-10C10	>hsa-miR-24-2*		2
			UGCCUACUGAGCUGAAACACAG
76.	miR-25	gnl|ti|1420207354 SS_WGS-418e20.q1k	>hsa-miR-25
			CAUUGCACUUGUCUCGGUCUGA
77.	miR-27a	emb|FP016000.3| SSC2 clone CH242-10C10	>hsa-miR-27a		2
			UUCACAGUGGCUAAGUUCCGC
78.	miR-27a		>bta-miR-27a
			UUCACAGUGGCUAAGUUCCG
79.	miR-27a		>ggo-miR-27a
			UUCACAGUGGCUAAGUUCCGCC
80.	miR-27b	emb|CU929857.2| SSC10 clone CH242-94A4	>hsa-miR-27b		10
			UUCACAGUGGCUAAGUUCUGC
81.	miR-27b*		>hsa-miR-27b*
			AGAGCUUAGCUGAUUGGUGAAC
82.	miR-28	emb|FP009754.1| SSC13 clone CH242-400C7, W... 154 5e-36	>ssc-miR-28		13
		emb|CU633300.4| SSC13 clone CH242-468C23	AAGGAGCUCACACUCUAUUGAG
83.	miR-29a	emb|CU928631.2| SSC18 clone CH242-250E19	>bta-miR-29a		18
			CUAGCACCAUCUGAAAUCGGUUA
84.	miR-29a		>ggo-miR-29a
			CUAGCACCAUCUGAAAUCGGUU
85.	miR-30a*	emb|CU861545.1| SSC1 clone CH242-237H9	>hsa-miR-30a*		1
			CUUUCAGUCGGAUGUUUGCAGC
86.	miR-30a-5p		>bta-miR-30a-5p
			UGUAAACAUCCUCGACUGGAAGCU
87.	miR-30c-2*	emb|CU914297.1|	>hsa-miR-30c-2*		1
		SSC1 clone CH242-79F11 emb|CU861545.1|	CUGGGAGAAGGCUGUUUACUCU
		SSC1 clone CH242-237H9
88.	miR-30d	emb|CU856307.2|	>bta-miR-30d		4
		SSC4 clone CH242-233L15 emb|CT990628.3|	UGUAAACAUCCCCGACUGGAAGCU
		SSC 4 clone CH242-15I4
89.	miR-30e	emb|CU466467.2| SSC6 clone CH242-342M8	>hsa-miR-30e		6
			UGUAAACAUCCUUGACUGGAAG
90.	miR-30e*		>hsa-miR-30e*
			CUUUCAGUCGGAUGUUUACAGC
91.	miR-31	emb|CU074336.3|	>mdo-miR-31		1
		SSC1 clone CH242-81E23 gb|AC127471.2|	GGAGGCAAGAUGUUGGCAUAGCUG
		Sus scrofa clone RP44-358P15
92.	miR-322		>mmu-miR-322
			CAGCAGCAAUUCAUGUUUUGGA
93.	miR-327		>mmu-miR-327
			ACUUGAGGGGCAUGAGGAU
94.	miR-328	emb|CU929920.2|	>hsa-miR-328		6
		SSC6 clone CH242-351A16	CUGGCCCUCUCUGCCCUUCCGU
95.	miR-340	emb|CU855926.2| SSC2 clone CH242-450C21,	>hsa-miR-340		2
			UUAUAAAGCAAUGAGACUGAUU
96.	miR-345-3p		>rno-miR-345-3p
			CCCUGAACUAGGGGUCUGGAGA
97.	miR-34b		>bta-miR-34b
			AGGCAGUGUAAUUAGCUGAUUG
98.	miR-34b		>rno-miR-34b
			UAGGCAGUGUAAUUAGCUGAUUG
99.	miR-34b-3p		>mmu-miR-34b-3p
			AAUCACUAACUCCACUGCCAUC
100.	miR-34c	emb|FP016172.3| SSC9 clone CH242-6L10	>bta-miR-34c		9
		emb|FP015891.2| SSC9 clone CH242-190F19,	AGGCAGUGUAGUUAGCUGAUUG
101.	miR-34c*		>mmu-miR-34c*
			AAUCACUAACCACACAGCCAGG
102.	miR-34c-3p		>hsa-miR-34c-3p
			AAUCACUAACCACACGGCCAGG
103.	miR-34c-5p		>hsa-miR-34c-5p
			AGGCAGUGUAGUUAGCUGAUUGC
104.	miR-361-5p	emb|FP102371.1|	>hsa-miR-361-5p		X
		SSCX clone CH242-33O21	UUAUCAGAAUCUCCAGGGGUAC
105.	miR-362-3p	emb|CU207271.5| SSCX clone CH242-214N22	>hsa-miR-362-3p		X
			AACACACCUAUUCAAGGAUUCA
106.	miR-375	gnl|ti|855392649 rbyb_32366.y1	>hsa-miR-375
			UUUGUUCGUUCGGCUCGCGUGA
107.	miR-375		>mdo-miR-375
			UUUUGUUCGUUCGGCUCGCGUGA
108.	miR-378	emb|CU914383.2| SSC2 clone CH242-278F6	>hsa-miR-378
			ACUGGACUUGGAGUCAGAAGG
109.	miR-383		>mmu-miR-383
			AGAUCAGAAGGUGACUGUGGCU
110.	miR-383		>hsa-miR-383
		gnl|ti|848837967 bla_73818.z1	AGAUCAGAAGGUGAUUGUGGCU
111.	miR-421	emb|CU606904.3| SSCX clone CH242-378E11	>hsa-miR-421		X
			AUCAACAGACAUUAAUUGGGCGC
112.	miR-424	gnl|ti|1420804291 SS_WGS-992n18.q1k	>hsa-miR-424
			CAGCAGCAAUUCAUGUUUUGAA		X
		emb|CU639462.3| SSCX clone CH242-164F18
113.	miR-424*		>hsa-miR-424*
			CAAAACGUGAGGCGCUGCUAU
114	miR-449a	emb|CU929626.3| SSC16 clone CH242-32G2	>hsa-miR-449a		16
		emb|CU856640.2| SSC16 clone CH242-178B1	UGGCAGUGUAUUGUUAGCUGGU
115	miR-449b	emb|CU929626.3| SSC16 clone CH242-32G2	>mmu-miR-449b		16
		emb|CU856640.2| SSC16 clone CH242-178B1	AGGCAGUGUUGUUAGCUGGC
116.	miR-449b		>hsa-miR-449b
			AGGCAGUGUAUUGUUAGCUGGC
117.	miR-449c		>mmu-miR-449c
			AGGCAGUGCAUUGCUAGCUGG
118.	SSC-miR-450	emb|CU639462.3| SSCX clone CH242-164F18	>cfa-miR-450		X
		emb|CU468475.2| SSCX clone CH242-274C3	UUUUUGCGAUGUGUUCCUAAUA
119.	miR-450b-5p		>hsa-miR-450b-5p
			UUUUGCAAUAUGUUCCUGAAUA
120.	miR-455	emb|CU861519.1| SSC1 clone CH242-133A15	>mmu-miR-455		1
		emb|CU606988.2| SSC1 clone CH242-513M8	GCAGUCCACGGGCAUAUACAC
121.	miR-455*		>bta-miR-455*
			GCAGUCCAUGGGCAUAUACACU
122.	miR-455-3p		>hsa-miR-455-3p
			GCAGUCCAUGGGCAUAUACAC
123.	miR-466g		>mmu-miR-466g
			AUACAGACACAUGCACACACA
124.	miR-467a*		>mmu-miR-467a*
			AUAUACAUACACACACCUACAC
125.	miR-467b*		>mmu-miR-467b*
			AUAUACAUACACACACCAACAC
126	miR-483		>mmu-miR-483
			AAGACGGGAGAAGAGAAGGGAG
127	miR-483-5p		>hsa-miR-483-5p
			AAGACGGGAGGAAAGAAGGGAG
128	miR-491-5p	emb|CU498950.2| SSC1 clone CH242-306I19	>hsa-miR-491-5p		1
		emb|CU074306.3| SSC1 clone CH242-81P8	AGUGGGGAACCCUUCCAUGAGG
129	miR-499-5p		>hsa-miR-499-5p
		emb|CU633434.1| SSC17 clone CH242-93B19	UUAAGACUUGCAGUGAUGUUU		17
130	miR-500	emb|CU207271.5| SSCX clone CH242-214N22	>hsa-miR-500		X
			UAAUCCUUGCUACCUGGGUGAGA
131	miR-500*		>hsa-miR-500*
			AUGCACCUGGGCAAGGAUUCUG
132	miR-501-3p		>mmu-miR-501-3p
			AAUGCACCCGGGCAAGGAUUUG
133	miR-502-3p		>hsa-miR-502-3p
			AAUGCACCUGGGCAAGGAUUCA
134	miR-503		>hsa-miR-503
		emb|CU639462.3| SSCX clone CH242-164F18	UAGCAGCGGGAACAGUUCUGCAG		X
135	miR-509-5p		>hsa-miR-509-5p
			UACUGCAGACAGUGGCAAUCA
136	miR-532-3p		>hsa-miR-532-3p
		emb|CU207271.5| SSCX clone CH242-214N22	CCUCCCACACCCAAGGCUUGCA		X
137	miR-542-3p		>hsa-miR-542-3p
			UGUGACAGAUUGAUAACUGAAA
138	miR-542-5p	emb|CU639462.3| SSCX clone CH242-164F18	>mmu-miR-542-5p		X
		emb|CU468475.2| SSCX clone CH242-274C3	CUCGGGGAUCAUCAUGUCACGA
139			>hsa-mir-574-3p		8
139.	miR-574-3p	emb|CU694791.2|,SSC8 clone CH242-295G5	CACGCUCAUGCACACACCCACA
140	miR-575		>hsa-miR-575
			GAGCCAGUUGGACAGGAGC
141	miR-623		>hsa-miR-623
			AUCCCUUGCAGGGGCUGUUGGGU
142	miR-628-5p		>hsa-miR-628-5p
		emb|CU041222.3| SSC1 clone CH242-20A9	AUGCUGACAUAUUUACUAGAGG		1
143	miR-638		>hsa-miR-638
			AGGGAUCGCGGGCGGGUGGCGGCCU
144	miR-652		>hsa-miR-652		7
		SSC7 clone CH242-14C3	AAUGGCGCCACUAGGGUUGUG
145	miR-660		>hsa-miR-660
		emb|CU207271.5| SSCX clone CH242-214N22	UACCCAUUGCAUAUCGGAGUUG		X
146	miR-663		>hsa-miR-663
			AGGCGGGGCGCCGCGGGACCGC
147	miR-671-5p		>hsa-miR-671-5p
		emb|FP102583.1|SSC18 clone CH242-165F21	AGGAAGCCCUGGAGGGGCUGGAG		18
148	miR-678		>mmu-miR-678
			GUCUCGGUGCAAGGACUGGAGG
149	miR-705		>mmu-miR-705
			GGUGGGAGGUGGGGUGGGCA
150	miR-709		>mmu-miR-709
			GGAGGCAGAGGCAGGAGGA
151	miR-7-1*		>hsa-miR-7-1*
			CAACAAAUCACAGUCUGCCAUA
152	miR-720		>mmu-miR-720
			AUCUCGCUGGGGCCUCCA
153	miR-744		>hsa-miR-744
			UGCGGGGCUAGGGCUAACAGCA
154	miR-762	emb|FP102237.2| SSC3 clone CH242-195I14	>mmu-miR-762		3
		emb|FP102303.2| SSC3 clone CH242-232B18	GGGGCUGGGGCCGGGACAGAGC
155	miR-765		>hsa-miR-765
			UGGAGGAGAAGGAAGGUGAUG
156	miR-769-5p	emb|FP102354.1 SSC6 clone CH242-94J5	>hsa-miR-769-5p		6
			UGAGACCUCUGGGUUCUGAGCU
157	miR-877	emb|FP067362.1| SSC7 clone CH242-312H17	>hsa-miR-877		7
			GUAGAGGAGAUGGCGCAGGG
158	miR-9	emb|CU468654.2| SSC4 clone CH242-228K10	>hsa-miR-9		4 or 2
		emb|CU468311.2| SSC4 clone CH242-144L15,	UCUUUGGUUAUCUAGCUGUAUGA
		emb|CU462930.3| SSC2 clone CH242-2C11
159	miR-9*		>mdo-miR-9*
			UAAAGCUAGAUAACCGAAAGU
160	miR-9*		>hsa-miR-9*
			AUAAAGCUAGAUAACCGAAAGU
161	miR-923	SSC5: CH242-517E21	>hsa-miR-923		5
			GUCAGCGGAGGAAAAGAAACU
162	miR-92a-1*	emb|CU019588.1| SSC11 clone CH242-392I14	>hsa-miR-92a-1*		11
			AGGUUGGGAUCGGUUGCAAUGCU
163	miR-99a	emb|CU467004.2| SSC13 clone CH242-179C11	>hsa-miR-99a
			AACCCGUAGAUCCGAUCUUGUG		13
164	miR-99a		>bta-miR-99aAACCCGUAGAUCCGAUCUUGU
Total					72
